## Epidemiological and immunological features of obesity and SARS-CoV-2

Eric J Nilles,<sup>1,2,3,4#</sup> Sameed M Siddiqui,<sup>5,6</sup> Stephanie Fischinger,<sup>7</sup> Yannic C Bartsch,<sup>7</sup> Michael de Saint Aubin,<sup>3</sup> Guohai Zhou,<sup>1,2</sup> Matthew J Gluck,<sup>8,14</sup> Samuel Berger,<sup>8</sup> Justin Rhee,<sup>8</sup> Eric Petersen,<sup>8</sup> Benjamin Mormann,<sup>1,8</sup> Michael Loesche,<sup>1,8</sup> Zhilin Chen,<sup>7</sup> Jingyou Yu,<sup>7,9</sup> Makda Gebre,<sup>7,9</sup> Caroline Atyeo,<sup>7</sup> Matthew J Gorman,<sup>7</sup> Alex Lee Zhu,<sup>7</sup> John Burke,<sup>7</sup> Matthew Slein,<sup>7</sup> Mohammad A Hasdianda,<sup>1,2</sup> Guruprasad Jambaulikar,<sup>1,2</sup> Edward Boyer,<sup>1,2</sup> Pardis Sabeti,<sup>4,6,9,10</sup> Dan H Barouch,<sup>6,11</sup> Boris D Julg,<sup>6</sup> Adam J Kucharski,<sup>13</sup> Elon R Musk,<sup>8</sup> Douglas A Lauffenburger,<sup>12</sup> Galit Alter,<sup>4,6</sup> Anil S Menon<sup>8</sup>

<sup>1</sup> Brigham and Women's Hospital, Boston, MA

<sup>2</sup> Harvard Medical School, Boston, MA

<sup>3</sup> Harvard Humanitarian Initiative, Boston, MA

<sup>4</sup> Massachusetts Consortium on Pathogen Readiness, Boston, MA

<sup>5</sup> Computational and Systems Biology Program, Massachusetts Institute of Technology, Cambridge, MA

<sup>6</sup> Broad Institute of MIT and Harvard, Cambridge, MA.

<sup>7</sup> Ragon Institute of MGH, MIT and Harvard, Cambridge, MA.

<sup>8</sup> Space Exploration Technologies Corp, Hawthorne, CA

<sup>9</sup> Harvard T.H. Chan School of Public Health, Boston, MA

<sup>10</sup> Howard Hughes Medical Institute, Chevy Chase, MD

<sup>11</sup> Center for Virology and Vaccine Research, Beth Israel Deaconess Medical Center, Harvard Medical School, Boston, MA

<sup>12</sup> Department of Biological Engineering, Massachusetts Institute of Technology, Cambridge, MA

<sup>13</sup> London School of Hygiene and Tropical Medicine, London

<sup>14</sup> Icahn School of Medicine- Mount Sinai, New York, NY

**# Correspondence:** Eric J Nilles: [enilles@bwh.harvard.edu](mailto:enilles@bwh.harvard.edu)

**The following authors contributed equally:** Galit Alter, Anil Menon

**Key words:** SARS-CoV-2; COVID-19; obesity; epidemiology; immunity

## **Abstract**

Obesity is a key correlate of severe SARS-CoV-2 outcomes while the role of obesity on risk of SARS-CoV-2 infection, symptom phenotype, and immune response are poorly defined. We examined data from a prospective SARS-CoV-2 cohort study to address these questions. Serostatus, body mass index, demographics, comorbidities, and prior COVID-19 compatible symptoms were assessed at baseline and serostatus and symptoms monthly thereafter. SARS-CoV-2 immunoassays included an IgG ELISA targeting the spike RBD, multiarray Luminex targeting 20 viral antigens, pseudovirus neutralization, and T cell ELISPOT assays. Our results from a large prospective SARS-CoV-2 cohort study indicate symptom phenotype is strongly influenced by obesity among younger but not older age groups; we did not identify evidence to suggest obese individuals are at higher risk of SARS-CoV-2 infection; and, remarkably homogenous immune activity across BMI categories suggests natural- and vaccine-induced protection may be similar across these groups.

## **Background**

Obesity is a key risk factor for severe disease and death from novel coronavirus disease 2019 (COVID-19) [1,2], the disease caused by severe acute respiratory syndrome coronavirus 2 (SARS-CoV-2). With over 1.9 billion people overweight or obese globally [3], implications for SARS-CoV-2 morbidity and mortality are substantial. After adjusting for age and obesity-related comorbidities such as diabetes, hypertension and coronary heart disease, obesity remains a strong independent predictor of excess morbidity and mortality [1,4,5]. These findings are not entirely unexpected [6]. Obesity and poor clinical outcomes have been described with other viral pathogens, most notably influenza A (H1N1) during the 2009 pandemic, when obesity was associated with increased hospitalizations, need for intensive care support, and deaths [4,7,8]. In addition to the relationship between obesity and clinical outcomes, emerging evidence suggests a link between higher body mass index (BMI) and higher incidence rates of COVID-19 or SARS-CoV-2 infection [4,9,10] suggesting increased BMI may enhance susceptibility to infection, with important implications for individual-level risks and population-level transmission dynamics [4]. The role of obesity on the immune response to SARS-CoV-2 has also been the focus of intense recent attention [4,11]. Obesity has been linked to less robust and/or effective immune response after natural influenza infection [12] or vaccination [13], raising concerns about diminished protective immunity following natural SARS-CoV-2 infection or vaccination [4,14]. However, no directly relevant data addresses this question.

Thus, given substantial uncertainty about multiple features of obesity and SARS-CoV-2, we investigated if BMI is associated with differential (i) risks of testing positive for anti-SARS-CoV-2 IgG antibodies, (ii) symptom phenotype, and (iii) adaptive immune features.

## **Methods**

### **Ethical Disclosures**

The study protocol was approved by the Western Institutional Review Board. The use of de-identified data and biological samples was approved by the Mass General Brigham Healthcare Institutional Review Board. All participants provided written informed consent.

### **Study design, setting and study population**

This study examines data from a prospective observational cohort study using serial serological assessment to characterize the immunoepidemiology of SARS-CoV-2 infection among industry employees. Serostatus was unknown at the time of subject enrollment. The study population was comprised of Space Exploration Technologies Corporation employees, all of whom were invited to participate. Study enrollment commenced 20 April and employees were invited to participate on a rolling basis through 28 July 2020; 4469 volunteered and were enrolled from ~8400 total employees from seven work locations in four US states. Serial blood sampling and interim symptom reporting were performed monthly.

### **Covariates**

Standardized data measures included demographic and medical history variables (listed in Table 1) and COVID-19 compatible symptoms between March 1, 2020, and study enrollment. Symptoms were classified as primary (fever, chills or feverish, cough, anosmia, ageusia) and other compatible symptoms (body or muscle aches, sore throat, nausea or vomiting, diarrhea, congestion, and increased fatigue/generalized weakness). Blood was sampled and interim symptoms were monitored monthly.

### **Laboratory analyses**

Serological analyses were performed using the Ragon/MGH enzyme-linked immunosorbent assay, which detects IgG against the receptor binding domain (RBD) of the SARS-CoV-2 spike glycoprotein using a previously described method [15] (Supplemental 1). Assay performance has been externally validated in a blinded fashion at 99.6% specific and benchmarked against commercial EUA approved assays [16].

Immune profiling methods are detailed in Supplement 1. Briefly, specific antibody subclasses and

isotypes and FcγR binding against SARS-CoV-2 RBD, nucleocapsid and full spike proteins were assessed using a custom Luminex multiplexed assay (Luminex Corp, TX). Viral neutralization was assessed on a SARS-CoV-2 pseudovirus assay, as described previously [17] with neutralization titer defined as the sample dilution associated with a 50% reduction in luminescent units. The presence of neutralizing activity was defined as a titer >20. T cell activity was assessed on an enzyme-linked interferon-gamma immunospot assay with  $\geq 25$  spot forming cells per  $10^6$  peripheral blood mononuclear cells considered positive.

### **Data classification and analyses**

Seropositivity was determined by the detection of SARS-CoV-2 specific IgG. BMI was calculated by dividing weight in kilograms by height in meters squared and categorized by underweight (<18.5 kg/m<sup>2</sup>), normal weight (18.5 to 24 kg/m<sup>2</sup>; reference), overweight (25 to 29 kg/m<sup>2</sup>), obesity class 1 (30 to 34 kg/m<sup>2</sup>), obesity class 2 (35 to 39 kg/m<sup>2</sup>), and obesity class 3 or severe obesity ( $\geq 40$  kg/m<sup>2</sup>) according to the World Health Organization.

We performed discrete analyses to address the three aims of the study. For assessment of risk of seropositivity by BMI, the primary exposure of interest was BMI and the outcome variable of interest was seropositivity at any time point. We assessed the unadjusted association between a range of demographic (n=7) and medical history (n=17) covariates using  $\chi^2$  to compare proportions and ANOVA or Kruskal-Wallis tests to compare means. For adjusted analyses, we constructed a multivariable logistic regression model that included, in addition to BMI and serostatus, age, sex, ethnicity, race, comorbidities, primary work location, number of individuals in the household, and children in the household.

To understand if obesity status is associated with differential reporting of symptoms, we computed the proportion of seropositive individuals reporting COVID-19 compatible symptoms stratified by obesity status. Symptoms were analyzed from the period preceding the first seropositive result. For example, if

an individual was seronegative at baseline and seropositive at the subsequent time point, the symptoms reported between those timepoints were analyzed. The primary exposure of interest was obesity, and symptoms the outcome variables of interest. Given data suggesting the adverse impact of obesity on COVID-19 mortality may decline with age [9], we assessed if similar age-dependent obesity risk may be observed for symptom reporting by conducting subgroup analysis stratified by  $<$  or  $\geq$  40 years, with categorization selected due to sparsity of older participants.

Lastly, given an accumulation of evidence that obesity impairs the immune response to a range of pathogens [6,13,18–20] we stratified 20 discrete immune features by obesity status to identify univariate differences. We also performed uniform manifold approximation and projection (UMAP) [21] a mathematical approach for exploratory analyses that constructs a visualizable summary of multiple subjects' characteristics, with each point representing an individual and clusters representing underlying uniformities in subject characteristics.

Binomial exact 95% confidence intervals were calculated and p-values  $<0.05$  were considered statistically significant. For adjusted analyses, variables with a p-value  $<0.10$  were assessed by backward elimination and excluded if the p-value was  $>0.10$  and did not meaningfully alter the point estimates of the remaining variables. Luminex UMAP and Mann-Whitney U Tests were conducted using scikit-learn, a machine learning toolkit for the Python programming language. Analyses were performed using the R software package (Version 4.0, [www.R-project.org/](http://www.R-project.org/)) or the Python programming language (Version 3.7, [python.org](http://python.org)). All available relevant data was included.

## Results

A total of 4469 Space Exploration Technologies Corporation employees out of a total of ~8400 employees (53%) were enrolled. Baseline characteristics are included in Table 1. Mean BMI was 27.1 kg/m<sup>2</sup> (SD 5.4) with a median of 25.8 kg/m<sup>2</sup> (range 15.6–60.9). Most subjects were normal weight

(18.5—24 kg/m<sup>2</sup>) (1686, 39.5%) or overweight (25—29 kg/m<sup>2</sup>) (1523, 35.7%), and 24.1% and 0.80% met criteria for obese ( $\geq 30$  kg/m<sup>2</sup>) and underweight ( $\leq 18.5$  kg/m<sup>2</sup>) respectively.

322 of 4469 (7.21%) study participants were seropositive of which five (1.6%) were hospitalized and none required critical care support or died. Unadjusted rates are detailed in Table 1 and were higher in South Texas (Odd Ratio 4.28 [95% CI, 2.54 to 7.21],  $p < 0.0001$ ) and among Hispanics (2.91 [95% CI 2.26—3.75],  $p < 0.0001$ ); and were lower in Seattle, Washington (0.30 [95% CI, 0.11 to 0.82],  $p = 0.02$ ), and in the 30—39 year age group (0.72 [95% CI, 0.56 to 0.94],  $p = 0.02$ ). Adjusted associations for all covariates are listed in Table 1; only primary work location remained significantly associated with serostatus with increased OR in South Texas (OR 4.28 [2.54 — 7.21],  $p < 0.0001$ ) and lower in Seattle (OR 0.30 [0.11—0.82],  $p = 0.02$ ) largely reflecting local transmission rates. The strong univariate association between Hispanic ethnicity and serostatus was not retained after adjusting for work location (OR 1.27 [0.94—1.73],  $p = 0.12$ ).

### **BMI and serostatus**

4270 of 4469 participants (95.5%) provided weight and height data and are included in BMI analyses. Unadjusted risks of seropositivity stratified by BMI are listed in the Table 1; only BMI 30 to 34 kg/m<sup>2</sup> (versus normal/healthy weight, 18.5—24 kg/m<sup>2</sup>) was associated with differential serostatus (OR 1.48 [1.06 to 2.05],  $p < 0.02$ ). However, after adjusting for all candidate variables (Table 1), no association was detected. Rather, higher BMI and in particular severe obesity (BMI  $\geq 40$  kg/m<sup>2</sup>) trended non-significantly to lower seroprevalence (Figure 1A). Subgroup analysis from a single high prevalence location where, given the high force of infection as evidenced by high seroprevalence (22.5% versus 4.2% for all other sites combined), we predict risks for infection — including any effect of BMI — would be more clearly delineated (Supplementary 2). Findings were similar to the primary analysis with no evidence of increased seroprevalence with increasing BMI. Rather, point prevalence measures consistently trended lower than normal/healthy weight (Figure 1B).



### **BMI and COVID-19 compatible symptoms**

Of 262 seropositive participants with complete symptom data, three (1.1%) were underweight (<18.5 kg/m<sup>2</sup>), 89 (34.0%) normal weight (18.5—24 kg/m<sup>2</sup>), 89 (34.0%) overweight (25—29 kg/m<sup>2</sup>), and 81 (30.9%) obese (≥30 kg/m<sup>2</sup>). A total of 106/262 (40.5%) reported one or more of 11 COVID-19-compatible symptoms and 68/262 (26.0%) reported one or more of five primary COVID-19 symptom.

When comparing symptoms between normal weight and overweight (but not obese) individuals, there were no meaningful differences or trends (Supplementary 3) and therefore subsequent analyses were stratified by obese versus non-obese.

Obesity was associated with increased reporting of multiple symptoms including fever, chills or feverish but no measured fever, myalgias, and ≥6 symptoms (Figure 2). With the exception of congestion (0.87 [0.43—1.70]), a similar and consistent but non-significant trend was observed for all symptoms. Overall, obese individuals registered more symptoms and more primary symptoms. Age appears to play an important role when assessing obesity and symptom phenotype and fever was more commonly reported among obese vs non-obese individuals under 40 years of age (OR 4.99 [1.97—13.35]) but not over 40 years (OR 1.32 [0.30—5.57]). Similarly, reporting ≥6 symptoms was more common among obese vs non—obese under 40 years (OR 3.0 [1.32—6.85]) but not for those greater than 40 years (OR 0.94 [0.18—4.26]). A strikingly similar trend was observed for most other symptoms and aggregate symptom measures (Figure 3). No similar age-dependent effect on obesity and symptomatology was observed when comparing age groups < 40 years of age (Supplementary 4).

### **Obesity and functional immune response**

Among the same 262 seropositive individuals, peak SARS-CoV-2 RBD IgG titers were 0.92 ug/ml (SD 2.47) among obese (n=81) and 1.12 ug/ml (SD 3.21) among non-obese (n=181) participants (p=0.601).

Deep immune profiling was performed among a subset of 77 participants including 25 obese and 52 non-obese individuals. Mean ELISA NC IgG titers were 0.35 (SD 0.48) among obese versus 0.30 (0.34)

among non-obese individuals ( $p=0.57$ ). Viral neutralization activity was detected in 3/25 (12.0%) and 6/52 (11.5%) of obese and non-obese individuals respectively ( $p=0.95$ ). When assessing 20 immune features measured by Luminex, no univariate differences were observed between obesity categories, with sparse levels across both obese and non-obese individuals tightly linked to antibody titers (Figure 4A, Supplementary 5). Similarly, no clustering or trends between BMI and immunological features were identifiable either by UMAP (Figure 4B) or Spearman's correlation (Figure 4C).

Lastly, given evidence that T cells may be key mediators of adaptive immunity in SARS-CoV-2, we examined responses to nucleocapsids protein or spike protein overlapping peptide pools quantified by IFN- $\gamma$  ELISpot among 12 obese and 28 non-obese individuals. There was no difference in the proportion with SARS-CoV-2 T cell activity ( $\geq 25$  SFC/ $10^6$  PBMCs) against nucleocapsid peptides (3/12 [25%] versus 7/28 [25.0%]) or spike peptides (3/12 [25%] versus 7/28 [25.0%]). In fact, the only difference observed was higher SFC against nucleocapsid (mean 124 SFC/ $10^6$  PBMCs [77] versus 47 SFC/ $10^6$  PBMCs [14],  $p=0.02$ ) but not spike (44 SFC/ $10^6$  PBMCs [4.0] versus 44 SFC/ $10^6$  PBMCs [20.0],  $p=1.00$ ) among obese versus non-obese individuals with T cell activity.

## Discussion

We present data from a multi-site prospective cohort of non-hospitalized individuals unbiased to serostatus at study entry to investigate the association between BMI, SARS-CoV-2 serostatus, symptom phenotype, and functional and non-functional immune measures. Given the prevalence of overweight/obese among adults is close to 70% in most high income countries and  $\geq 50\%$ , in many lower and middle income countries, the scientific and public health implications for the current pandemic are substantial [4]. By combining traditional epidemiological approaches with deep immune profiling, these data provide key insights into the epidemiology and immune characteristics of obesity in SARS-CoV-2 infections.

Studies that report an increased risk of COVID-19 or SARS-CoV-2 infection with higher BMI are intriguing and raise essential questions about factors driving transmission. Given the global burden of obesity, delineating risks for infection is a public health priority. Interestingly, our findings diverge from recent published reports that examine the risk for COVID-19 by BMI including a nationwide case-control study from South Korea [9] and a cross-sectional study from a primary care surveillance network in the United Kingdom [22] that identified an increased risk of COVID-19 with increasing BMI. A recent meta-analysis of 20 studies reported a pooled increased risk of 46.0% (OR = 1.46; 95% CI, 1.30–1.65;  $p < 0.0001$ ) with 18 of 20 studies demonstrating higher COVID-19 risk among obese individuals.[4] Our study did not identify an increase in adjusted seroprevalence with increasing BMI and conversely identified a trend to lower infection risk with higher obesity classes. This trend was consistent when both considering all data and when performing subgroup analysis on a high transmission site where the increased force of infection may more precisely delineate heterogeneity in infection risks. Reasons for the difference between our and prior study outcomes are likely multifactorial with differences in study design, obesity classification, and population behaviors likely influencing findings. However, a key difference is we examined SARS-CoV-2 infection risk using serological methods unbiased to exposure risks or presence or absence of symptoms at study entry versus prior studies examined risks for clinically apparent infection (i.e. COVID-19). As such, our primary outcome measure was SARS-CoV-2 infection rather than clinically apparent disease, a key difference that likely contributes to differences in study findings and conclusions. Given obese individuals exhibit more pronounced symptomatology including fever, as our data indicates, this population is more likely to meet testing criteria and therefore likely to be over-represented in studies that identify study populations through routine surveillance approaches [23,24]. Our finding that obesity is associated with increased COVID-19 compatible symptoms among SARS-CoV-2 seropositive individuals provides benchmark data for understanding symptom heterogeneity in mild infections by BMI. We demonstrate that not only are well established measures of severe disease such

as hospitalization, intensive care requirements and death more common among obese individuals [5,25,26], but obesity is also an important driver of symptomatology in non-severe infections. While our data does not provide insights into the mechanism driving these findings, it informs our understanding of symptom phenotype and obesity, guides our interpretation of epidemiological data, and highlights potential implications of using passively collected symptom-driven surveillance data to characterize the epidemiology of infectious pathogens. We also identify an intriguing influence of age on obesity symptom reporting, with a compelling association below 40 years of age but near complete absence of effect in older adults. These findings are notable given they imply the established interaction between obesity and age on COVID-19 morbidity and mortality, with obesity disproportionately driving increased disease severity among younger age groups [5,25], extend throughout the spectrum of disease and are not restricted to severe disease.

Given the fundamental role of the adaptive immune response in both the resolution of infection and the severity of disease [11], we also probed multiple binding and functional immune markers to assess differential immune responses by obesity status. While, previous studies noted poor seroconversion and inadequate seroprotection across vaccine trials targeting other pathogens [27], we did not detect meaningful differences in binding or neutralizing antibodies, T cell activity, or other functional humoral measures by BMI among SARS-CoV-2 infections. These findings, while notable, should be considered in the context of this cohort in which >98% of infections were asymptomatic or mild and therefore may not capture the full range of disease burden associated with SARS-CoV-2. Yet, the overlapping and indistinguishable antibody and T-cell helper profiles point to unaltered adaptive immunity with BMI, raising the possibility that BMI-driven immunological changes during SARS-CoV-2 infection may manifest largely within the innate immune response. Significant alterations in chronic inflammation, particularly driven by persistent innate cytokine responses from adipocytes, have been noted in the setting of obesity [28]. Dissecting the influence of adipocyte inflammatory responses, associated cytokine storm,

and enhanced symptomatology, particularly among individuals with a high BMI, may point to mechanistic differences in viral sensing across populations. These data point to remaining knowledge gaps on the relative importance and interplay of the humoral, cellular and innate immunity in SARS-CoV-2 infection and disease [29].

### **Limitations**

Although this study is unique in combining a large prospective, multisite serology-based SARS-CoV-2 cohort with deep immune profiling, there are limitations. The study population are industry employees with higher representation of Hispanic ethnicity, white race, male sex, and younger individuals with less comorbidities than the US population, therefore findings may not be generalizable. Other potential study limitations should be noted but their impact would be expected to be evenly distributed across cohort participants and therefore not introduce a systematic bias and impact study findings. These include (i) limited recall of COVID-19 compatible symptoms, (ii) delayed seroconversion relative to reported symptoms, so depending on timing of infection and blood sampling, some registered symptoms may not be due to SARS-CoV-2 infection, and (ii) false positive serological results. Lastly, behavioral factors, which can be critical drivers of transmission, and may be influenced by BMI, were not assessed in this study.

### **Conclusion**

We demonstrate that obesity influences symptom phenotype in mild COVID-19 infections, suggesting obesity impacts the pathophysiology of COVID-19 throughout the spectrum of disease severity. Our findings do not, however, suggest that obesity increases susceptibility to SARS-CoV-2 infection. Nor did we identify immunological features differentiating obese from non-obese individuals across mild and asymptomatic infection, a hopeful signal that both natural infection- and vaccine-induced protective immunity may be similar across these populations.

## Funding

This work was supported by Space Exploration Technologies Corporation; the Brigham and Women's Department of Emergency Medicine; the Ragon Institute of MGH, MIT and Harvard; the Massachusetts Consortium on Pathogen Readiness; the Gates foundation Global Health Vaccine Accelerator Platform funding; Nancy Zimmerman; Mark and Lisa Schwartz; Terry and Susan Ragon; SAMANA Kay MGH Research Scholars award; US Food and Drug Administration [HHSF223201810172C] to SMS; and National Institute for Allergy and Infectious Disease [U19 AI135995] to DAL.

## Acknowledgements

We would like to thank Eric Fischer for S protein production efforts and Jared Feldman, Blake Marie Hauser, Tim Caradonna and Aaron Schmidt for generating receptor binding domain antigen. We would also like to thank the many SpaceX employees that volunteered to participate in the study.

## References

1. Hamer M, Gale CR, Kivimäki M, Batty GD. Overweight, obesity, and risk of hospitalization for COVID-19: A community-based cohort study of adults in the United Kingdom. *Proc Natl Acad Sci*. 2020;117(35):21011–3.
2. Seidu S, Gillies C, Zaccardi F, Kunutsor SK, Hartmann-Boyce J, Yates T, et al. The impact of obesity on severe disease and mortality in people with SARS-CoV-2: A systematic review and meta-analysis. *Endocrinology, Diabetes and Metabolism*. 2020.
3. WHO. Obesity and overweight: Fact sheet. WHO Media Cent [Internet]. 2020; Available from: <https://www.who.int/news-room/fact-sheets/detail/obesity-and-overweight>
4. Popkin BM, Du S, Green WD, Beck MA, Algaith T, Herbst CH, et al. Individuals with obesity and COVID-19: A global perspective on the epidemiology and biological relationships. *Obes Rev*.

5. Tartof SY, Qian L, Hong V, Wei R, Nadjafi RF, Fischer H, et al. Obesity and Mortality Among Patients Diagnosed With COVID-19: Results From an Integrated Health Care Organization. *Ann Intern Med*.
6. Falagas ME, Kompoti M. Obesity and infection. *Lancet Infectious Diseases*. 2006.
7. Kwong JC, Campitelli MA, Rosella LC. Obesity and respiratory hospitalizations during influenza seasons in Ontario, Canada: A cohort study. *Clin Infect Dis*. 2011;53(5):413–21.
8. Centers for Disease Control and Prevention (CDC). Intensive-care patients with severe novel influenza A (H1N1) virus infection - Michigan, June 2009. *MMWR Morb Mortal Wkly Rep*. 2009;58:749–52.
9. Jung C-Y, Park H, Kim DW, Lim H, Chang JH, Choi YJ, et al. Association between Body Mass Index and Risk of COVID-19: A Nationwide Case-Control Study in South Korea. *Clin Infect Dis*. 2020;
10. Ghoneim S, Umer Butt M, Hamid O, Shah A, Asaad I. The incidence of COVID-19 in patients with metabolic syndrome and non-alcoholic steatohepatitis: A population-based study. *Metab Open*.
11. García LF. Immune Response, Inflammation, and the Clinical Spectrum of COVID-19. *Frontiers in Immunology*. 2020.
12. Karlsson EA, Sheridan PA, Beck MA. Diet-Induced Obesity Impairs the T Cell Memory Response to Influenza Virus Infection. *J Immunol*. 2010;184(6):3127–33.
13. Neidich SD, Green WD, Rebeles J, Karlsson EA, Schultz-Cherry S, Noah TL, et al. Increased risk of influenza among vaccinated adults who are obese. *Int J Obes*. 2017;41(9):1324–30.
14. Wadman M. Why COVID-19 is more deadly in people with obesity—even if they’re young. *Science* (New York, NY) [Internet]. Available from: <https://www.sciencemag.org/news/2020/09/why-covid-19-more-deadly-people-obesity-even-if-theyre-young>
15. Roy V, Fischinger S, Atyeo C, Slein M, Loos C, Balazs A, et al. SARS-CoV-2-specific ELISA

- development. *J Immunol Methods*. 2020;
16. Nilles EJ, Karlson EW, Norman M, Gilboa T, Fischinger S, Atyeo C, et al. Evaluation of two commercial and two non-commercial immunoassays for the detection of prior infection to SARS-CoV-2. *medRxiv*. 2020;
  17. Atyeo C, Fischinger S, Zohar T, Slein MD, Burke J, Loos C, et al. Distinct Early Serological Signatures Track with SARS-CoV-2 Survival. *Immunity*. 2020;
  18. Milner JJ, Sheridan PA, Karlsson EA, Schultz-Cherry S, Shi Q, Beck MA. Diet-Induced Obese Mice Exhibit Altered Heterologous Immunity during a Secondary 2009 Pandemic H1N1 Infection. *J Immunol*. 2013;191(5):2474–85.
  19. Sheridan PA, Paich HA, Handy J, Karlsson EA, Hudgens MG, Sammon AB, et al. Obesity is associated with impaired immune response to influenza vaccination in humans. *Int J Obes*. 2012;36(8):1072–7.
  20. Zimmermann P, Curtis N. Factors that influence the immune response to vaccination. *Clin Microbiol Rev*. 2019;32(2):e00084-18.
  21. Becht E, McInnes L, Healy J, Dutertre CA, Kwok IWH, Ng LG, et al. Dimensionality reduction for visualizing single-cell data using UMAP. *Nat Biotechnol*. 2019;
  22. de Lusignan S, Dorward J, Correa A, Jones N, Akinyemi O, Amirthalingam G, et al. Risk factors for SARS-CoV-2 among patients in the Oxford Royal College of General Practitioners Research and Surveillance Centre primary care network: a cross-sectional study. *Lancet Infect Dis*. 2020;
  23. Gibbons CL, Mangen MJJ, Plass D, Havelaar AH, Brooke RJ, Kramarz P, et al. Measuring underreporting and under-ascertainment in infectious disease datasets: A comparison of methods. *BMC Public Health*. 2014;14(147).
  24. Lipsitch M, Donnelly CA, Fraser C, Blake IM, Cori A, Dorigatti I, et al. Potential biases in estimating absolute and relative case-fatality risks during outbreaks. *PLoS Neglected Tropical Diseases*. 2015.



25. Kass DA, Duggal P, Cingolani O. Obesity could shift severe COVID-19 disease to younger ages. *Lancet*. 2020;395(10236):1544–5.
26. Deng M, Qi Y, Deng L, Wang H, Xu Y, Li Z, et al. Obesity as a Potential Predictor of Disease Severity in Young COVID-19 Patients: A Retrospective Study. *Obesity*.
27. Painter SD, Ovsyannikova IG, Poland GA. The weight of obesity on the human immune response to vaccination. *Vaccine*. 2015.
28. Méry G, Epaulard O, Borel AL, Toussaint B, Le Gouellec A. COVID-19: Underlying Adipokine Storm and Angiotensin 1-7 Umbrella. *Front Immunol*. 2020;
29. Moderbacher CR, Ramirez SI, Dan JM, Grifoni A, Hastie KM, Weiskopf D, et al. Antigen-specific adaptive immunity to SARS-CoV-2 in acute COVID-19 and associations with age and disease severity. *Cell*.

**Table 1. Characteristics and serostatus of study participants (n=4469)**

| Characteristic <sup>1</sup>         | All participants (n=4469) | Seropositive participants (n=322) |       | OR (95% CI)          | P-Value <sup>5</sup> |
|-------------------------------------|---------------------------|-----------------------------------|-------|----------------------|----------------------|
|                                     | N                         | N                                 | %     |                      |                      |
| <b>Age group</b>                    |                           |                                   |       |                      |                      |
| 18-29 y                             | 1668                      | 133                               | 8.0%  | ref                  |                      |
| 30-39 y                             | 1761                      | 104                               | 5.9%  | 0.72 (0.56 to 0.94)  | 0.0174*              |
| 40-49 y                             | 584                       | 50                                | 8.6%  | 1.08 (0.77 to 1.52)  | 0.6545               |
| 50-59 y                             | 315                       | 26                                | 8.3%  | 1.04 (0.67 to 1.61)  | 0.8666               |
| 60+ y                               | 85                        | 2                                 | 2.4%  | 0.28 (0.07 to 1.14)  | 0.076                |
| <b>BMI</b>                          |                           |                                   |       |                      |                      |
| <18.5                               | 34                        | 3                                 | 8.8%  | 1.44 (0.43 to 4.80)  | 0.5500               |
| 18.5-<25                            | 1686                      | 106                               | 6.3%  | ref                  |                      |
| 25-<30                              | 1523                      | 101                               | 6.6%  | 1.06 (0.80 to 1.40)  | 0.6916               |
| 30-<35                              | 676                       | 61                                | 9.0%  | 1.48 (1.06 to 2.05)  | 0.0196*              |
| 35-<40                              | 246                       | 23                                | 9.3%  | 1.54 (0.96 to 2.47)  | 0.0742               |
| ≥40                                 | 105                       | 5                                 | 4.8%  | 0.75 (0.30 to 1.87)  | 0.5308               |
| <b>Ethnicity</b>                    |                           |                                   |       |                      |                      |
| Not Hispanic/Not Latinx             | 2492                      | 113                               | 4.5%  | ref                  |                      |
| Hispanic/Latinx                     | 1274                      | 155                               | 12.2% | 2.91 (2.26 to 3.75)  | <0.0001****          |
| <b>Race</b>                         |                           |                                   |       |                      |                      |
| White                               | 2862                      | 185                               | 6.5%  | ref                  |                      |
| American Indian/Alaska Native       | 32                        | 3                                 | 9.4%  | 1.50 (0.45 to 4.96)  | 0.5092               |
| Asian                               | 442                       | 18                                | 4.1%  | 0.61 (0.37 to 1.01)  | 0.0535               |
| Black                               | 72                        | 2                                 | 2.8%  | 0.41 (0.10 to 1.70)  | 0.2207               |
| Native Hawaiian/Pacific Islander    | 29                        | 2                                 | 6.9%  | 1.07 (0.25 to 4.54)  | 0.9249               |
| More than one race                  | 292                       | 13                                | 4.5%  | 0.67 (0.38 to 1.20)  | 0.1796               |
| <b>Sex<sup>2</sup></b>              |                           |                                   |       |                      |                      |
| Female                              | 600                       | 40                                | 6.7%  | ref                  |                      |
| Male                                | 3730                      | 267                               | 7.2%  | 1.08 (0.77 to 1.52)  | 0.6634               |
| <b>Children ≤ 18 y in household</b> |                           |                                   |       |                      |                      |
| No                                  | 3014                      | 204                               | 6.8%  | ref                  |                      |
| Yes                                 | 1342                      | 106                               | 7.9%  | 1.18 (0.93 to 1.51)  | 0.1808               |
| <b>No. in household</b>             |                           |                                   |       |                      |                      |
| 1                                   | 640                       | 41                                | 6.4%  | ref                  |                      |
| 2-4                                 | 3027                      | 214                               | 7.1%  | 1.11 (0.79 to 1.57)  | 0.5490               |
| >4                                  | 659                       | 51                                | 7.7%  | 1.23 (0.80 to 1.88)  | 0.3499               |
| <b>Primary work location</b>        |                           |                                   |       |                      |                      |
| Cape Canaveral, Florida             | 268                       | 17                                | 6.3%  | ref                  |                      |
| Hawthorne, California               | 2859                      | 111                               | 3.9%  | 0.60 (0.35 to 1.01)  | 0.0544               |
| McGregor, Texas                     | 257                       | 21                                | 8.2%  | 1.31 (0.68 to 2.55)  | 0.4202               |
| Seattle, Washington                 | 253                       | 5                                 | 2.0%  | 0.30 (0.11 to 0.82)  | 0.0190*              |
| South Texas, Texas                  | 712                       | 160                               | 22.5% | 4.28 (2.54 to 7.21)  | <0.0001****          |
| Other                               | 69                        | 1                                 | 1.4%  | 0.23 (0.03 to 1.79)  | 0.1623               |
| <b>Comorbidities<sup>3,4</sup></b>  |                           |                                   |       |                      |                      |
| Asthma                              | 368                       | 20                                | 5.4%  | 0.72 (0.45 to 1.15)  | 0.1721               |
| Hypertension                        | 356                       | 26                                | 7.3%  | 1.02 (0.67 to 1.54)  | 0.9405               |
| Diabetes mellitus                   | 101                       | 11                                | 10.9% | 1.59 (0.84 to 3.01)  | 0.1509               |
| Coronary heart disease              | 17                        | 1                                 | 5.9%  | 0.80 (0.11 to 6.08)  | 0.8329               |
| Stroke                              | 9                         | 2                                 | 22.2% | 3.70 (0.76 to 17.87) | 0.1039               |
| Emphysema/COPD                      | 9                         | 1                                 | 11.1% | 1.61 (0.20 to 12.93) | 0.6532               |
| Cancer - not receiving treatment    | 39                        | 2                                 | 5.1%  | 0.69 (0.17 to 2.89)  | 0.6163               |
| Other lung disease                  | 26                        | 2                                 | 7.7%  | 1.07 (0.25 to 4.56)  | 0.9233               |
| Other immunocompromised             | 61                        | 4                                 | 6.6%  | 0.92 (0.33 to 2.55)  | 0.8710               |
| Other chronic medical condition     | 176                       | 9                                 | 5.1%  | 0.72 (0.36 to 1.43)  | 0.3471               |
| <b>Smoking history</b>              |                           |                                   |       |                      |                      |
| Never                               | 3769                      | 263                               | 7.0%  | ref                  |                      |
| Prior                               | 367                       | 24                                | 6.5%  | 0.93 (0.61 to 1.44)  | 0.7514               |
| Current                             | 229                       | 23                                | 10.0% | 1.49 (0.95 to 2.33)  | 0.0826               |

1 Not reported data: age group (n=56), BMI (199), ethnicity (703), race (740), sex (139), children in HH (113), No. in HH (143), primary location (51), comorbidities (105)

2 Four (4) reported "other sex", none were seropositive

3 For comorbidities reference value for OR is no. COPD chronic obstructive pulmonary disease

4 Other comorbidities with no seropositive participants: chronic kidney disease (10), Heart failure (4), Cancer receiving treatment (3), Other heart disease (22).

5 P-values unadjusted for multiple hypothesis testing: \* <0.05. \*\*<0.01, \*\*\*<0.001, \*\*\*\*<0.0001

**Figure 1. Forest plots of adjusted odds ratio for seropositivity by BMI as a categorical variable with normal BMI (18.5-<25) as reference.** (A) Includes participants with BMI measures and demonstrates a non-significant trend to declining seroprevalence with BMI  $\geq 40$  kg/m<sup>2</sup> when compared to normal/healthy weight (BMI 18.5-24 kg/m<sup>2</sup>) (n=4270). (B) Includes only participants from a single high seroprevalence (22.5%) location in South Texas where the high force of infection may more clearly delineate infection risks (n=629).

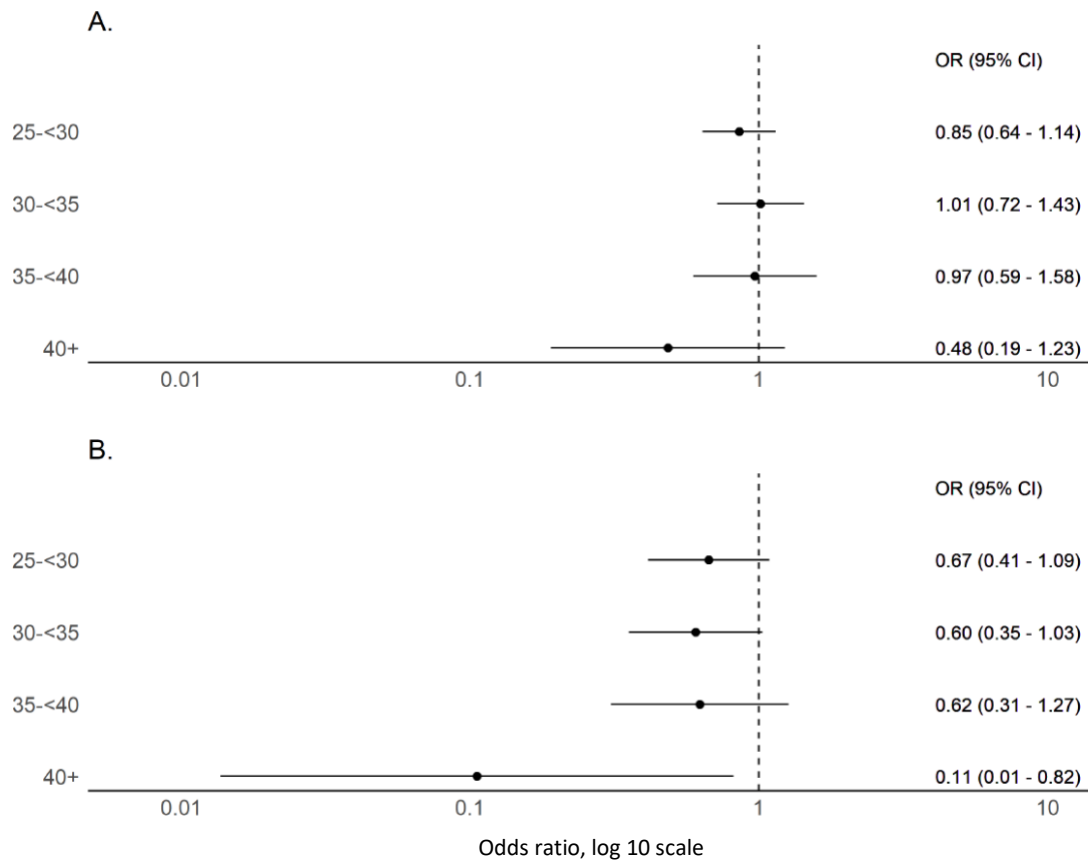

**Figure 2. Forest plot of odds ratios of reported COVID-19 compatible symptoms among obese (n=85) versus non-obese (n=179) SARS-CoV-2 seropositive individuals**

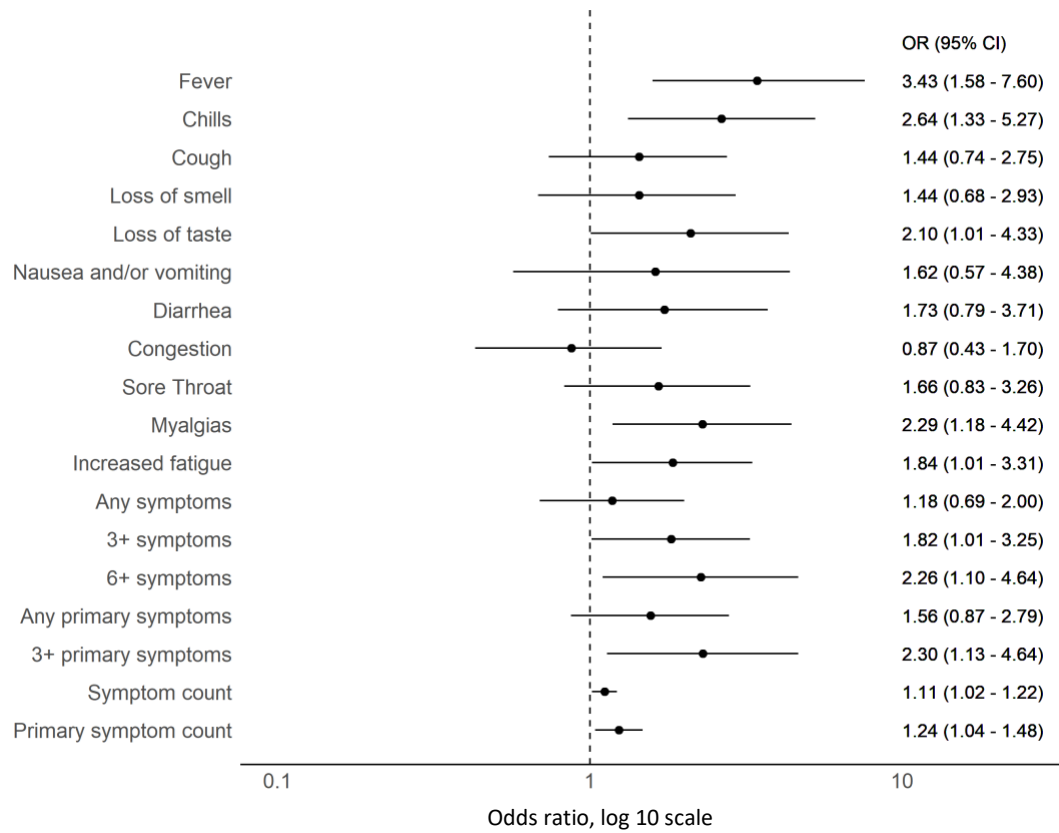

**Figure 3. Forest plot of odds ratios of COVID-19 compatible symptoms among obese versus non-obese SARS-CoV-2 seropositive individuals stratified by (A) <40 years (n=195) and (B) ≥ 40 years (n=67)**

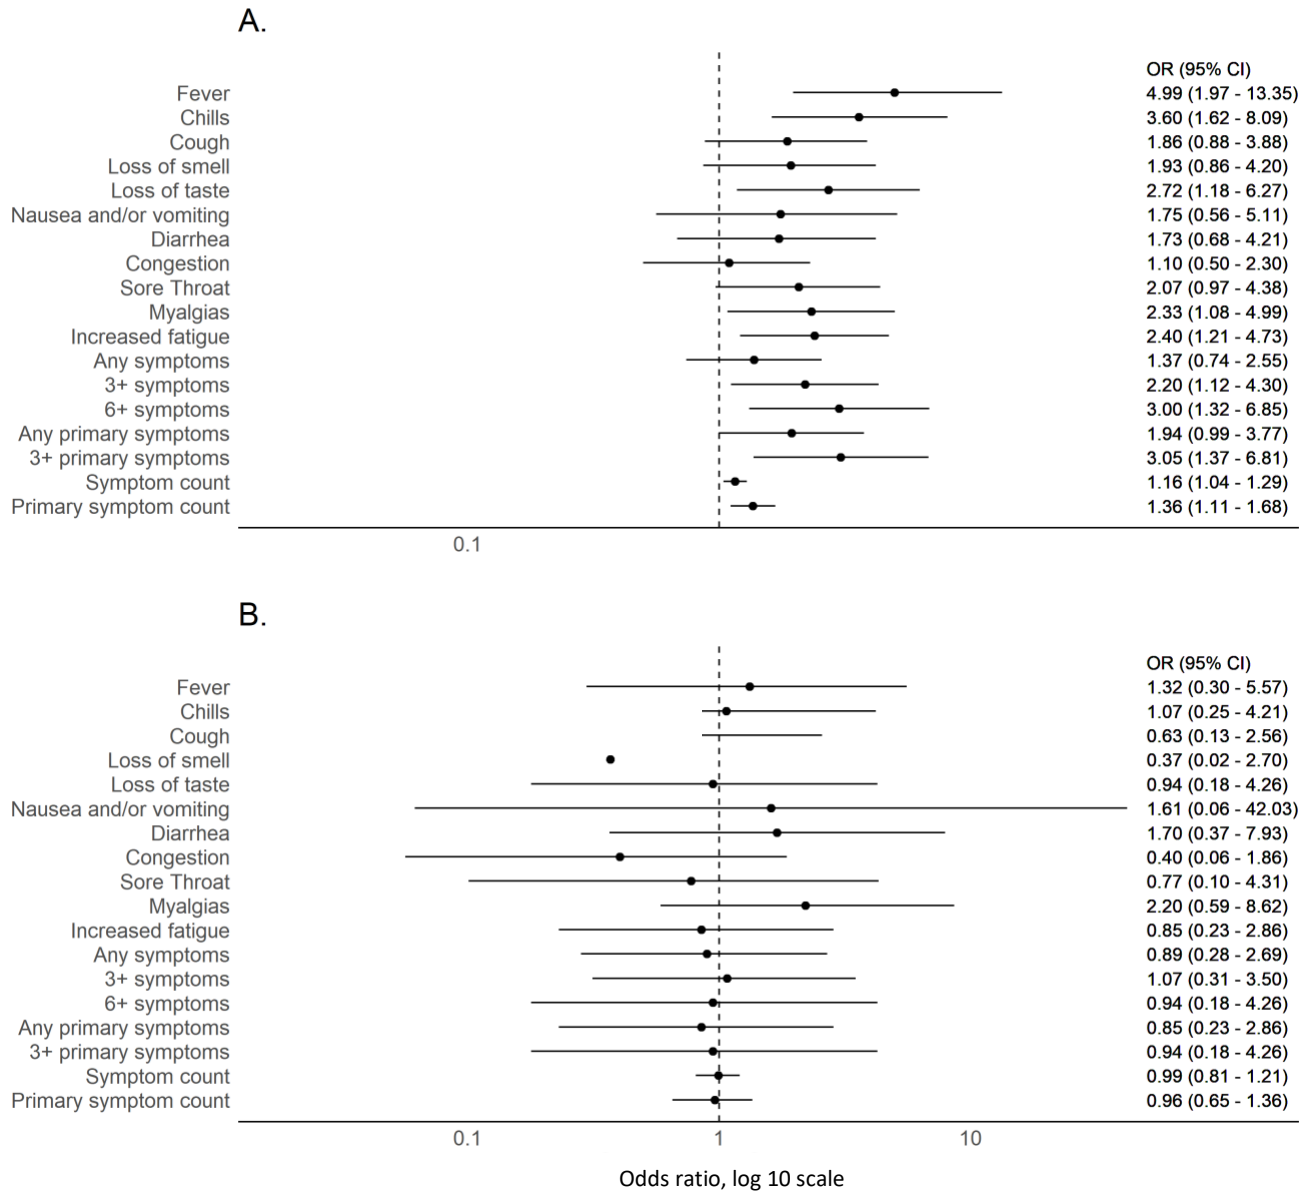

**Figure 4. Limited influence of BMI on SARS-CoV-2 antibody profiles (n=77).** (A) The dot plots show similar mean fluorescent intensity levels of IgG1, IgM, IgG3, and IgA levels across individuals classified as normal weight (n=29), overweight (n=23), and obese (n=25). (B) The uniform manifold approximation and projection (UMAP) shows the relationship between antibody profiles and BMI (dot size, color intensity), highlighting the limited influence of BMI on shaping SARS-CoV-2 antibody responses. (C) Correlation plot of shows limited correlation between BMI and 20 immunological features.

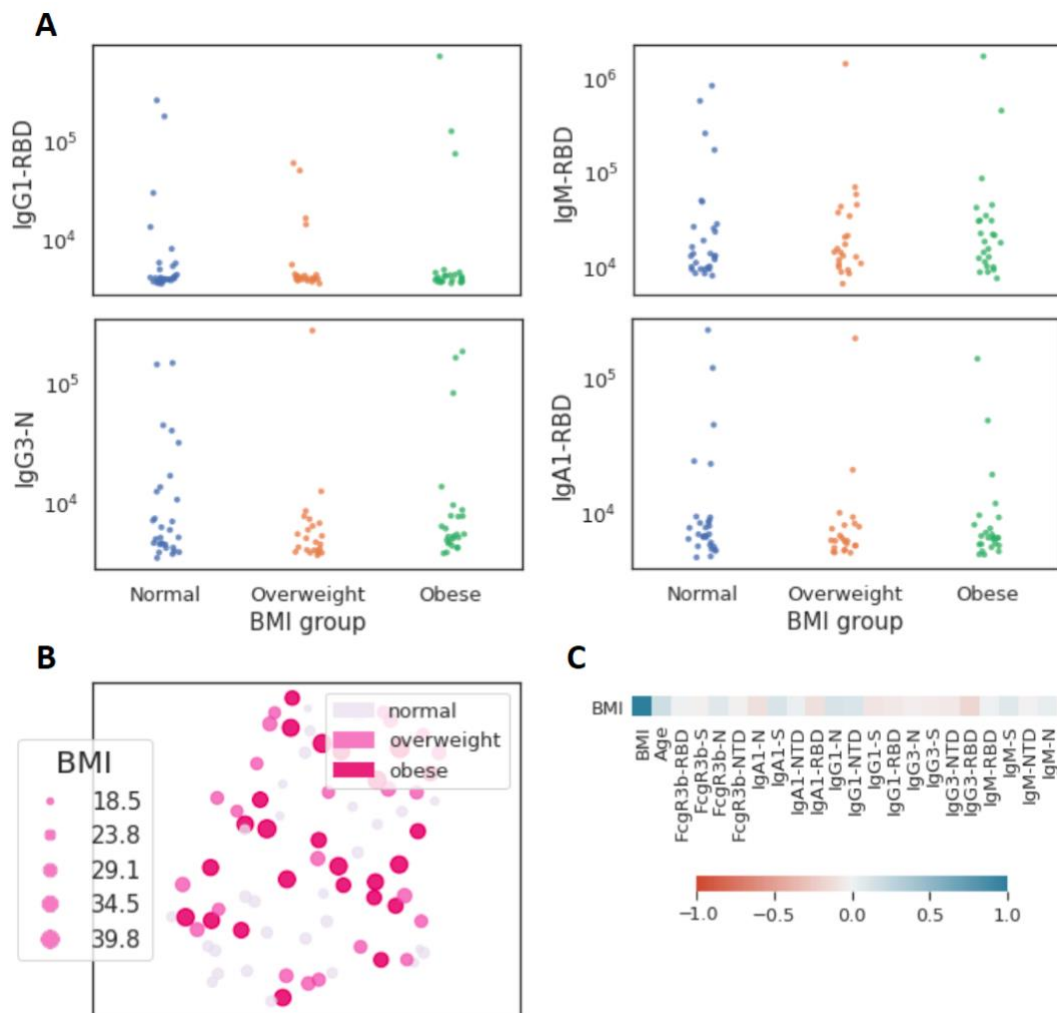

Source: https://medrxiv.org/content/medrxiv/early/2020/12/11/2020.11.11.20229724.full.pdf
